# Supplementary material for: Exposure to road traffic noise and cognitive development in schoolchildren in Barcelona, Spain: A population-based cohort study
Source: PubMed Central journal article supplement (PMC9162347; doi:10.1371/journal.pmed.1004001), 2022-06-02
Supplement: pmed.1004001.s002.pdf [file pmed.1004001.s002.pdf]

**S1 Table. Percent or median (interquartile range) of paired school characteristics by low or high school nitrogen dioxide levels.**

|                                                     | Low NO <sub>2</sub><br>(n=19) | High NO <sub>2</sub><br>(n=19) | p-value <sup>a</sup> |
|-----------------------------------------------------|-------------------------------|--------------------------------|----------------------|
| Modeled school NO <sub>2</sub> (µg/m <sup>3</sup> ) | 30.49 (25.12)                 | 59.41 (6.00)                   | 0.0001               |
| School SES vulnerability index (n)                  | 0.55 (0.48)                   | 0.42 (0.39)                    | 0.2083               |
| Type of school, public (%)                          | 57.9                          | 42.1                           | 0.3300               |

<sup>a</sup>Kruskal Wallis test for continuous variables or Chi<sup>2</sup> test for categorical variables. NO<sub>2</sub>: Modeled school nitrogen dioxide levels. Low NO<sub>2</sub> ≤ 51 µg/m<sup>3</sup> / High NO<sub>2</sub> > 51 µg/m<sup>3</sup>. SES: socio-economic status.
