# Supplementary material for: Exposure to road traffic noise and cognitive development in schoolchildren in Barcelona, Spain: A population-based cohort study
Source: PubMed Central journal article supplement (PMC9162347; doi:10.1371/journal.pmed.1004001), 2022-06-02
Supplement: pmed.1004001.s003.pdf [file pmed.1004001.s003.pdf]

**S2 Table. Main school- and individual-level characteristics of the study sample by the median of street-outdoor average noise levels at school (LAeq, dB).**

| Variables                                    | LAeq < p50 <sup>a</sup> | LAeq ≥ p50 <sup>a</sup> | p-value <sup>b</sup> |
|----------------------------------------------|-------------------------|-------------------------|----------------------|
|                                              | Median (IQR)<br>or %    | Median (IQR)<br>or %    |                      |
| <b>School-level variables (n=38)</b>         |                         |                         |                      |
| Type of school, public                       | 55%                     | 44.4%                   | 0.516                |
| School socioeconomic vulnerability index (n) | 0.5 (0.5)               | 0.4 (0.3)               | 0.076                |
| School education quality (PISA 2012, n)      | 5.0 (3.0)               | 3.0 (2.0)               | < 0.001              |
| <b>Individual-level variables (n=2680)</b>   |                         |                         |                      |
| 2-back number stimuli (d') <sup>c</sup>      | 220.9 (261.1)           | 205.1 (231.9)           | 0.127                |
| 3-back number stimuli (d') <sup>d</sup>      | 111.8 (131.0)           | 111.8 (125.0)           | 0.087                |
| ANT (HRT-SE) <sup>e</sup>                    | 262.3 (134.5)           | 271.9 (142.1)           | 0.012                |
| Age (years)                                  | 8.5 (1.5)               | 8.5 (1.4)               | 0.194                |
| Girls                                        | 49.6%                   | 50.3%                   | 0.731                |
| Maternal education, university               | 62.9%                   | 54.1%                   | < 0.001              |
| Paternal education, university               | 57.1%                   | 48.7%                   | < 0.001              |
| Foreign origin (non-Spanish)                 | 10.5%                   | 19.6%                   | < 0.001              |
| Marital status, married                      | 86.7%                   | 83.3%                   | 0.015                |
| Overweight, Yes                              | 25.7%                   | 29.7%                   | 0.026                |
| Computer games weekend, > 1h                 | 68.5%                   | 72.5%                   | 0.032                |
| Siblings, Yes                                | 82.1%                   | 75.8%                   | < 0.001              |
| Adopted child, Yes                           | 4.3%                    | 3.5%                    | 0.276                |
| Smoking during pregnancy, Yes                | 10.9%                   | 9.4%                    | 0.197                |
| Birth ≥ 37 weeks                             | 92.2%                   | 92%                     | 0.882                |
| Birth weight ≥ 2.5 kg                        | 90.2%                   | 89.8%                   | 0.736                |
| Breastfeeding, Yes                           | 82.5%                   | 81.4%                   | 0.478                |
| Behavioural problems (SDQ)                   | 7.0 (7.0)               | 8.0 (7.0)               | < 0.001              |
| Home socioeconomic vulnerability index (n)   | 0.4 (0.4)               | 0.5 (0.3)               | < 0.001              |

<sup>a</sup>Median Street LAeq, dB = 63.5 dB. LAeq: A-weighted equivalent noise levels. <sup>b</sup>Kruskal Wallis test for continuous variables or Chi<sup>2</sup> test for categorical variables. PISA: Programme for International Student Assessment. <sup>c</sup>Working memory, <sup>d</sup>Complex working memory. d': detectability, a higher value indicates better working memory, <sup>e</sup>Inattentiveness: Hit Reaction Time Standard Error (HRT-SE, ms) of the Attention Network Task, a higher value indicates greater inattentiveness. SDQ: Strengths and Difficulties Questionnaire.
