# Supplementary material for: Exposure to road traffic noise and cognitive development in schoolchildren in Barcelona, Spain: A population-based cohort study
Source: PubMed Central journal article supplement (PMC9162347; doi:10.1371/journal.pmed.1004001), 2022-06-02
Supplement: pmed.1004001.s004.pdf [file pmed.1004001.s004.pdf]

**S3 Table. Pearson correlations between noise and traffic-related air pollution levels at schools (n=38), and at individual-level (n=2680 children)**

|                                 |                                | SCHOOL                                         |              |                   |              |              |               |              |              |              |              |              |              | HOME                  |              |
|---------------------------------|--------------------------------|------------------------------------------------|--------------|-------------------|--------------|--------------|---------------|--------------|--------------|--------------|--------------|--------------|--------------|-----------------------|--------------|
| ( <i>r</i> , <i>p</i> -value)   | LAeq, street                   | LAeq, playgr.                                  | LAeq, in     | LAeq, in (indiv.) | IR, street   | IR, playgr.  | IR, in        | NE, street   | NE, playgr.  | NE, in       | TRAPs, in    | TRAPs, out   | Lday, street | NO <sub>2</sub> , out | Lden, out    |
| SCHOOL                          | LAeq, street (dB)              | 1.00, <0.001                                   |              |                   |              |              |               |              |              |              |              |              |              |                       |              |
|                                 | LAeq, playground (dB)          | 0.74, <0.001                                   | 1.00, <0.001 |                   |              |              |               |              |              |              |              |              |              |                       |              |
|                                 | LAeq, indoor (dB)              | 0.34, 0.038                                    | 0.47, 0.004  | 1.00, <0.001      |              |              |               |              |              |              |              |              |              |                       |              |
|                                 | LAeq, indoor (individual) (dB) | 0.36, <0.001                                   | 0.44, <0.001 | 0.63, <0.001      | 1.00, <0.001 |              |               |              |              |              |              |              |              |                       |              |
|                                 | IR, street (%)                 | -0.19, 0.251                                   | -0.34, 0.044 | -0.45, 0.005      | -0.10, 0.547 | 1.00, <0.001 |               |              |              |              |              |              |              |                       |              |
|                                 | IR, playground (%)             | 0.38, 0.023                                    | 0.32, 0.059  | 0.05, 0.758       | 0.03, 0.870  | 0.15, 0.377  | 1.00, <0.001  |              |              |              |              |              |              |                       |              |
|                                 | IR, indoor (%)                 | 0.26, 0.110                                    | 0.14, 0.426  | 0.14, 0.405       | 0.37, 0.022  | 0.29, 0.078  | 0.40, 0.017   | 1.00, <0.001 |              |              |              |              |              |                       |              |
|                                 | NE, street (number)            | 0.64, <0.001                                   | 0.37, 0.029  | 0.00, 0.988       | 0.33, 0.042  | 0.29, 0.074  | 0.33, 0.050   | 0.32, 0.053  | 1.00, <0.001 |              |              |              |              |                       |              |
|                                 | NE, playground (number)        | 0.51, 0.002                                    | 0.49, 0.002  | 0.24, 0.161       | 0.11, 0.536  | 0.02, 0.919  | 0.82, <0.001  | 0.30, 0.081  | 0.50, 0.002  | 1.00, <0.001 |              |              |              |                       |              |
|                                 | NE, indoor (number)            | 0.43, 0.007                                    | 0.30, 0.076  | 0.37, 0.024       | 0.45, 0.004  | 0.11, 0.500  | 0.26, 0.123   | 0.83, <0.001 | 0.43, 0.007  | 0.31, 0.067  | 1.00, <0.001 |              |              |                       |              |
|                                 | TRAP, indoor                   | 0.67, <0.001                                   | 0.58, <0.001 | 0.54, <0.001      | 0.51, 0.001  | -0.22, 0.191 | 0.11, 0.529   | 0.27, 0.100  | 0.36, 0.027  | 0.22, 0.207  | 0.54, <0.001 | 1.00, <0.001 |              |                       |              |
|                                 | TRAP, outdoor                  | 0.70, <0.001                                   | 0.68, <0.001 | 0.46, 0.004       | 0.48, 0.003  | -0.15, 0.384 | 0.28, 0.094   | 0.27, 0.107  | 0.40, 0.014  | 0.41, 0.012  | 0.44, 0.005  | 0.79, <0.001 | 1.00, <0.001 |                       |              |
|                                 | Lday, street <sup>a</sup>      | 0.85, <0.001                                   | 0.70, <0.001 | 0.37, 0.033       | 0.38, 0.029  | -0.43, 0.012 | 0.36, 0.043   | 0.26, 0.135  | 0.50, 0.003  | 0.54, 0.001  | 0.39, 0.023  | 0.59, <0.001 | 0.66, <0.001 | 1.00, <0.001          |              |
|                                 | HOME                           | NO <sub>2</sub> , outdoor (µg/m <sup>3</sup> ) | 0.30, <0.001 | 0.23, <0.001      | 0.19, <0.001 | 0.18, <0.001 | -0.09, <0.001 | 0.19, <0.001 | 0.01, 0.513  | 0.15, <0.001 | 0.18, <0.001 | 0.10, <0.001 | 0.29, <0.001 | 0.28, <0.001          | 0.21, <0.001 |
| Lden, outdoor (dB) <sup>b</sup> |                                | -0.01, 0.581                                   | -0.01, 0.629 | 0.03, 0.131       | 0.08, <0.001 | -0.01, 0.505 | -0.03, 0.165  | 0.04, 0.052  | -0.03, 0.093 | -0.02, 0.350 | 0.02, 0.328  | 0, 0.854     | 0.01, 0.594  | -0.02, 0.287          | 0.33, <0.001 |

<sup>a</sup> n=34; <sup>b</sup> n=2346. LAeq: Measured A-weighted equivalent noise level, IR: Measured noise intermittency Ratio, NE: Measured Number of noise Events, TRAP: Measured Traffic-related air pollution (NO<sub>2</sub> and EC), NO<sub>2</sub>: Modelled nitrogen dioxide, Lday: LAeq for the day-time (7 a.m.-9 p.m.), Lden: LAeq for the 24h (Lden) with 5 dB and 10 dB penalties for the evening (9 p.m. to 11 p.m.) and night-time (11 p.m. to 7 a.m.), respectively. Very light blue:  $r = |0 \text{ to } 0.40|$ , Medium blue:  $r = |0.41 \text{ to } 0.70|$ , darkest blue:  $r = |0.71 \text{ to } 1.00|$ .
