# Supplementary material for: Exposure to road traffic noise and cognitive development in schoolchildren in Barcelona, Spain: A population-based cohort study
Source: PubMed Central journal article supplement (PMC9162347; doi:10.1371/journal.pmed.1004001), 2022-06-02
Supplement: pmed.1004001.s005.pdf [file pmed.1004001.s005.pdf]

**S4 Table. Estimated unadjusted effect ( $\beta$ ) and 95% confidence intervals (95%CI) in cognitive outcomes at baseline and their 12-month change in association to school and home exposure to road traffic noise (n = 2680 children, 9984 repeats).**

| Road traffic noise indicators              | Working memory<br>(2-back numbers, d') |             |                                  |             | Complex working memory<br>(3-back numbers, d') |             |                                  |             | Inattentiveness<br>(Attention Network task, HRT -SE[ms]) |             |                                  |             |
|--------------------------------------------|----------------------------------------|-------------|----------------------------------|-------------|------------------------------------------------|-------------|----------------------------------|-------------|----------------------------------------------------------|-------------|----------------------------------|-------------|
|                                            | Baseline<br>$\beta$ (95% CI)           | p-<br>value | 12-mo change<br>$\beta$ (95% CI) | p-<br>value | Baseline<br>$\beta$ (95% CI)                   | p-<br>value | 12-mo change<br>$\beta$ (95% CI) | p-<br>value | Baseline<br>$\beta$ (95% CI)                             | p-<br>value | 12-mo change<br>$\beta$ (95% CI) | p-<br>value |
| <i><u>SCHOOL (MEASURED)</u></i>            |                                        |             |                                  |             |                                                |             |                                  |             |                                                          |             |                                  |             |
| <i>Average level (LAeq, per 5dB)</i>       |                                        |             |                                  |             |                                                |             |                                  |             |                                                          |             |                                  |             |
| Street                                     | -6.68 (-11.13, -2.22)                  | 0.003       | -4.74 (-7.18, -2.30)             | <0.001      | -4.70 (-8.11, -1.28)                           | 0.007       | -3.95 (-5.89, -2.02)             | <0.001      | 6.08 (1.08, 11.08)                                       | 0.017       | 2.22 (0.49, 3.95)                | 0.012       |
| Playground                                 | -7.60 (-13.59, -1.61)                  | 0.013       | -3.44 (-6.61, -0.26)             | 0.034       | -5.37 (-9.88, -0.85)                           | 0.020       | -4.31 (-6.84, -1.78)             | <0.001      | 7.70 (1.41, 13.99)                                       | 0.016       | 2.10 (-0.13, 4.33)               | 0.064       |
| Indoor                                     | -7.74 (-13.93, -1.55)                  | 0.014       | -0.21 (-3.82, 3.40)              | 0.910       | -4.07 (-8.90, 0.76)                            | 0.099       | -0.63 (-3.50, 2.23)              | 0.664       | 9.79 (3.65, 15.94)                                       | 0.002       | 1.40 (-1.13, 3.92)               | 0.278       |
| Individual indoor                          | -1.28 (-5.72, 3.16)                    | 0.572       | -2.02 (-5.83, 1.78)              | 0.298       | -0.81 (-4.37, 2.75)                            | 0.655       | -0.82 (-3.87, 2.24)              | 0.600       | 1.74 (-1.08, 4.56)                                       | 0.226       | 2.57 (0.13, 5.00)                | 0.039       |
| <i>Intermittency ratio (per 10%)</i>       |                                        |             |                                  |             |                                                |             |                                  |             |                                                          |             |                                  |             |
| Street                                     | 1.47 (-2.68, 5.61)                     | 0.488       | 0.73 (-1.32, 2.78)               | 0.486       | 1.42 (-1.72, 4.56)                             | 0.375       | -0.63 (-2.25, 0.99)              | 0.446       | -2.57 (-6.84, 1.71)                                      | 0.240       | 0.28 (-1.18, 1.74)               | 0.704       |
| Playground                                 | -6.58 (-12.12, -1.04)                  | 0.020       | -2.29 (-5.22, 0.64)              | 0.126       | -5.94 (-9.83, -2.06)                           | 0.003       | -3.34 (-5.66, -1.02)             | 0.005       | 3.87 (-2.29, 10.02)                                      | 0.218       | 3.76 (1.67, 5.84)                | <0.001      |
| Indoor                                     | -0.86 (-5.82, 4.09)                    | 0.733       | -2.19 (-4.65, 0.27)              | 0.080       | -0.90 (-4.61, 2.82)                            | 0.637       | -2.76 (-4.70, -0.82)             | 0.005       | 0.18 (-5.06, 5.41)                                       | 0.947       | 3.09 (1.35, 4.83)                | <0.001      |
| <i>Number of events (per 50)</i>           |                                        |             |                                  |             |                                                |             |                                  |             |                                                          |             |                                  |             |
| Street                                     | -3.56 (-8.96, 1.83)                    | 0.195       | -4.27 (-7.06, -1.49)             | 0.003       | -3.15 (-7.21, 0.91)                            | 0.128       | -3.93 (-6.14, -1.73)             | <0.001      | 2.49 (-3.27, 8.24)                                       | 0.398       | 2.24 (0.25, 4.23)                | 0.027       |
| Playground                                 | -7.35 (-13.54, -1.17)                  | 0.020       | -2.28 (-5.37, 0.81)              | 0.147       | -6.33 (-10.70, -1.97)                          | 0.004       | -2.91 (-5.36, -0.46)             | 0.020       | 4.30 (-2.76, 11.36)                                      | 0.233       | 2.31 (0.12, 4.49)                | 0.038       |
| Indoor                                     | -1.85 (-7.46, 3.77)                    | 0.519       | -2.67 (-5.48, 0.14)              | 0.062       | -1.87 (-6.07, 2.32)                            | 0.381       | -3.21 (-5.43, -1.00)             | 0.005       | 1.96 (-3.97, 7.89)                                       | 0.517       | 3.32 (1.32, 5.31)                | 0.001       |
| <i><u>SCHOOL &amp; HOME (MODELLED)</u></i> |                                        |             |                                  |             |                                                |             |                                  |             |                                                          |             |                                  |             |
| <i>Average level (LAeq, per 5dB)</i>       |                                        |             |                                  |             |                                                |             |                                  |             |                                                          |             |                                  |             |
| School street, Lday <sup>a</sup>           | -5.14 (-10.31, 0.03)                   | 0.051       | -6.45 (-9.22, -3.67)             | <0.001      | -3.81 (-7.72, 0.10)                            | 0.056       | -4.99 (-7.18, -2.80)             | <0.001      | 4.73 (-0.92, 10.39)                                      | 0.101       | 3.08 (1.12, 5.04)                | 0.002       |
| Home street, Lden <sup>b</sup>             | 0.62 (-1.67, 2.91)                     | 0.597       | 1.77 (-0.43, 3.97)               | 0.115       | 0.71 (-1.06, 2.48)                             | 0.431       | 0.67 (-1.07, 2.40)               | 0.450       | 0.22 (-1.67, 2.10)                                       | 0.821       | -0.82 (-2.37, 0.74)              | 0.303       |

Unadjusted linear mixed models include age, corresponding noise indicator and age  $\times$  noise indicator to estimate the change. Child and school included as nested random effects. d': detectability: a higher value indicates better working memory, HRT-SE: Hit Reaction Time Standard Error: a higher value indicates greater inattentiveness. LAeq: A-weighted equivalent noise levels, Lday: LAeq for the day-time (7 a.m.-9 p.m.), Lden: LAeq for the 24h (Lden) with 5 dB and 10 dB penalties for the evening (9 p.m. to 11 p.m.) and night-time (11 p.m. to 7 a.m.), respectively. <sup>a</sup> n=34; <sup>b</sup> n=2346.
