# Supplementary material for: Exposure to road traffic noise and cognitive development in schoolchildren in Barcelona, Spain: A population-based cohort study
Source: PubMed Central journal article supplement (PMC9162347; doi:10.1371/journal.pmed.1004001), 2022-06-02
Supplement: pmed.1004001.s006.pdf [file pmed.1004001.s006.pdf]

**S5 Table. Unadjusted and additionally adjusted models for the association between school exposure to average noise levels (LAeq, per 5 dB change) and 12-month change of working memory, complex working memory and inattentiveness. (n = 2680 children, 9984 repeats).**

| Working memory (2-back number stimuli (detectability: d')) <sup>a</sup> |                      |         |                      |         |                     |         |                         |         |
|-------------------------------------------------------------------------|----------------------|---------|----------------------|---------|---------------------|---------|-------------------------|---------|
| Model                                                                   | LAeq, street         |         | LAeq, playground     |         | LAeq, indoor        |         | LAeq, individual indoor |         |
|                                                                         | $\beta$ (95%CI)      | p-value | $\beta$ (95%CI)      | p-value | $\beta$ (95%CI)     | p-value | $\beta$ (95%CI)         | p-value |
| M0                                                                      | -4.74 (-7.18, -2.30) | <0.001  | -3.44 (-6.61, -0.26) | 0.034   | -0.21 (-3.82, 3.40) | 0.910   | -2.02 (-5.83, 1.78)     | 0.298   |
| M1                                                                      | -4.81 (-7.19, -2.43) | <0.001  | -3.67 (-6.75, -0.58) | 0.020   | 0.22 (-3.30, 3.74)  | 0.904   | -1.82 (-5.48, 1.85)     | 0.332   |
| M2                                                                      | -4.83 (-7.21, -2.45) | <0.001  | -3.68 (-6.76, -0.61) | 0.019   | 0.14 (-3.38, 3.66)  | 0.937   | -1.95 (-5.61, 1.71)     | 0.296   |
| M3                                                                      | -4.83 (-7.22, -2.44) | <0.001  | -3.67 (-6.75, -0.59) | 0.020   | 0.17 (-3.36, 3.70)  | 0.924   | -1.93 (-5.61, 1.75)     | 0.304   |
| M4                                                                      | -4.84 (-7.25, -2.42) | <0.001  | -3.70 (-6.83, -0.58) | 0.020   | -0.19 (-3.78, 3.40) | 0.918   | -2.22 (-5.98, 1.55)     | 0.249   |
| M5                                                                      | -4.85 (-7.24, -2.46) | <0.001  | -3.93 (-7.00, -0.85) | 0.012   | -0.16 (-3.69, 3.37) | 0.929   | -2.21 (-5.90, 1.49)     | 0.241   |
| M6                                                                      | -4.97 (-7.37, -2.56) | <0.001  | -3.92 (-7.04, -0.80) | 0.014   | -0.11 (-3.69, 3.47) | 0.951   | -1.76 (-5.50, 1.98)     | 0.357   |
| M7                                                                      | -4.77 (-7.20, -2.35) | <0.001  | -3.64 (-6.77, -0.51) | 0.023   | -0.67 (-4.25, 2.90) | 0.713   | -2.61 (-6.32, 1.10)     | 0.168   |
| M8                                                                      | -4.86 (-7.30, -2.43) | <0.001  | -3.99 (-7.15, -0.84) | 0.013   | -0.57 (-4.17, 3.03) | 0.756   | -2.50 (-6.26, 1.26)     | 0.192   |
| M9                                                                      | -4.79 (-7.19, -2.40) | <0.001  | -3.66 (-6.75, -0.57) | 0.020   | 0.28 (-3.27, 3.82)  | 0.879   | -1.91 (-5.62, 1.81)     | 0.314   |
| M10                                                                     | -4.88 (-7.28, -2.49) | <0.001  | -3.70 (-6.79, -0.61) | 0.019   | 0.21 (-3.33, 3.76)  | 0.906   | -1.61 (-5.32, 2.11)     | 0.396   |
| M11                                                                     | -4.75 (-7.17, -2.33) | <0.001  | -3.74 (-6.87, -0.61) | 0.019   | 0.17 (-3.43, 3.77)  | 0.927   | -1.57 (-5.34, 2.19)     | 0.413   |
| M12                                                                     | -4.91 (-7.34, -2.48) | <0.001  | -3.73 (-6.87, -0.58) | 0.020   | 0.39 (-3.23, 4.02)  | 0.831   | -1.76 (-5.55, 2.03)     | 0.363   |
| M13                                                                     | -4.99 (-7.41, -2.57) | <0.001  | -3.55 (-6.70, -0.40) | 0.027   | 0.27 (-3.35, 3.89)  | 0.882   | -1.85 (-5.64, 1.93)     | 0.337   |
| M14                                                                     | -4.76 (-7.15, -2.38) | <0.001  | -3.88 (-6.97, -0.79) | 0.014   | 0.10 (-3.45, 3.66)  | 0.954   | -1.75 (-5.46, 1.97)     | 0.357   |
| M15                                                                     | -4.95 (-7.33, -2.57) | <0.001  | -3.66 (-6.72, -0.59) | 0.019   | -0.11 (-3.61, 3.40) | 0.953   | -1.81 (-5.45, 1.84)     | 0.331   |
| M16                                                                     | -4.91 (-7.30, -2.53) | <0.001  | -4.00 (-7.11, -0.89) | 0.012   | 0.10 (-3.43, 3.64)  | 0.954   | -2.02 (-5.73, 1.70)     | 0.287   |
| M17                                                                     | -4.63 (-7.00, -2.26) | <0.001  | -3.66 (-6.71, -0.62) | 0.018   | 0.16 (-3.34, 3.66)  | 0.930   | -1.82 (-5.50, 1.85)     | 0.330   |
| M18                                                                     | -4.83 (-7.21, -2.45) | <0.001  | -3.68 (-6.76, -0.61) | 0.019   | 0.14 (-3.38, 3.66)  | 0.937   | -1.95 (-5.61, 1.71)     | 0.296   |

**S5 Table (Continued)**

| Complex working memory (3-back number stimuli (detectability: d')) <sup>a</sup> |                      |         |                      |         |                     |         |                         |         |
|---------------------------------------------------------------------------------|----------------------|---------|----------------------|---------|---------------------|---------|-------------------------|---------|
| Model                                                                           | LAeq, street         |         | LAeq, playground     |         | LAeq, indoor        |         | LAeq, individual indoor |         |
|                                                                                 | $\beta$ (95%CI)      | p-value | $\beta$ (95%CI)      | p-value | $\beta$ (95%CI)     | p-value | $\beta$ (95%CI)         | p-value |
| M0                                                                              | -3.95 (-5.89, -2.02) | <0.001  | -4.31 (-6.84, -1.78) | <0.001  | -0.63 (-3.50, 2.23) | 0.664   | -0.82 (-3.87, 2.24)     | 0.600   |
| M1                                                                              | -4.02 (-5.92, -2.11) | <0.001  | -4.41 (-6.89, -1.93) | <0.001  | -0.45 (-3.27, 2.37) | 0.755   | -0.78 (-3.76, 2.20)     | 0.607   |
| M2                                                                              | -4.01 (-5.91, -2.10) | <0.001  | -4.41 (-6.89, -1.94) | <0.001  | -0.44 (-3.25, 2.38) | 0.762   | -0.80 (-3.78, 2.19)     | 0.601   |
| M3                                                                              | -4.00 (-5.91, -2.09) | <0.001  | -4.41 (-6.89, -1.93) | <0.001  | -0.38 (-3.20, 2.45) | 0.793   | -0.71 (-3.71, 2.28)     | 0.642   |
| M4                                                                              | -3.84 (-5.77, -1.91) | <0.001  | -4.31 (-6.82, -1.80) | <0.001  | -0.13 (-3.00, 2.74) | 0.932   | -0.41 (-3.47, 2.64)     | 0.791   |
| M5                                                                              | -3.87 (-5.78, -1.96) | <0.001  | -4.31 (-6.79, -1.83) | <0.001  | -0.53 (-3.36, 2.30) | 0.714   | -0.62 (-3.62, 2.39)     | 0.686   |
| M6                                                                              | -3.89 (-5.80, -1.97) | <0.001  | -4.27 (-6.77, -1.77) | <0.001  | -0.24 (-3.10, 2.63) | 0.871   | -0.50 (-3.53, 2.53)     | 0.746   |
| M7                                                                              | -4.27 (-6.21, -2.32) | <0.001  | -4.91 (-7.44, -2.38) | <0.001  | -1.31 (-4.19, 1.56) | 0.370   | -1.54 (-4.57, 1.49)     | 0.318   |
| M8                                                                              | -4.29 (-6.24, -2.35) | <0.001  | -4.80 (-7.35, -2.25) | <0.001  | -0.72 (-3.61, 2.17) | 0.625   | -1.15 (-4.22, 1.91)     | 0.461   |
| M9                                                                              | -3.87 (-5.78, -1.96) | <0.001  | -4.27 (-6.75, -1.78) | <0.001  | -0.17 (-3.01, 2.66) | 0.905   | -0.43 (-3.45, 2.58)     | 0.779   |
| M10                                                                             | -3.87 (-5.79, -1.96) | <0.001  | -4.18 (-6.67, -1.69) | <0.001  | -0.14 (-2.97, 2.70) | 0.925   | -0.21 (-3.23, 2.81)     | 0.892   |
| M11                                                                             | -3.73 (-5.66, -1.79) | <0.001  | -4.16 (-6.68, -1.63) | 0.001   | -0.11 (-3.00, 2.77) | 0.939   | -0.11 (-3.18, 2.96)     | 0.942   |
| M12                                                                             | -3.65 (-5.58, -1.71) | <0.001  | -4.08 (-6.60, -1.55) | 0.002   | -0.19 (-3.08, 2.71) | 0.900   | -0.19 (-3.27, 2.89)     | 0.903   |
| M13                                                                             | -3.72 (-5.66, -1.78) | <0.001  | -4.40 (-6.94, -1.87) | <0.001  | -0.42 (-3.32, 2.49) | 0.779   | -0.17 (-3.26, 2.92)     | 0.915   |
| M14                                                                             | -3.86 (-5.77, -1.95) | <0.001  | -4.34 (-6.83, -1.84) | <0.001  | -0.41 (-3.26, 2.43) | 0.775   | -0.59 (-3.63, 2.44)     | 0.702   |
| M15                                                                             | -4.11 (-6.02, -2.21) | <0.001  | -4.40 (-6.87, -1.92) | <0.001  | -0.75 (-3.56, 2.05) | 0.600   | -0.66 (-3.63, 2.30)     | 0.661   |
| M16                                                                             | -4.11 (-6.01, -2.21) | <0.001  | -4.81 (-7.31, -2.32) | <0.001  | -0.57 (-3.40, 2.25) | 0.691   | -1.15 (-4.15, 1.86)     | 0.455   |
| M17                                                                             | -3.77 (-5.67, -1.87) | <0.001  | -4.21 (-6.68, -1.74) | <0.001  | -0.37 (-3.19, 2.44) | 0.796   | -0.65 (-3.65, 2.34)     | 0.668   |
| M18                                                                             | -4.01 (-5.91, -2.10) | <0.001  | -4.41 (-6.89, -1.94) | <0.001  | -0.44 (-3.25, 2.38) | 0.762   | -0.80 (-3.78, 2.19)     | 0.601   |

**S5 Table (Continued)**

| Model | Inattentiveness (Attention Network Test, Hit reaction time standard error, HRT-SE, ms) <sup>b</sup> |         |                    |         |                    |         |                         |         |
|-------|-----------------------------------------------------------------------------------------------------|---------|--------------------|---------|--------------------|---------|-------------------------|---------|
|       | LAeq, street                                                                                        |         | LAeq, playground   |         | LAeq, indoor       |         | LAeq, individual indoor |         |
|       | $\beta$ (95%CI)                                                                                     | p-value | $\beta$ (95%CI)    | p-value | $\beta$ (95%CI)    | p-value | $\beta$ (95%CI)         | p-value |
| M0    | 2.22 (0.49, 3.95)                                                                                   | 0.012   | 2.10 (-0.13, 4.33) | 0.064   | 1.40 (-1.13, 3.92) | 0.278   | 2.57 (0.13, 5.00)       | 0.039   |
| M1    | 2.08 (0.37, 3.78)                                                                                   | 0.017   | 1.99 (-0.20, 4.18) | 0.075   | 1.08 (-1.40, 3.56) | 0.393   | 2.36 (-0.05, 4.76)      | 0.055   |
| M2    | 2.07 (0.37, 3.77)                                                                                   | 0.017   | 1.99 (-0.20, 4.17) | 0.075   | 1.11 (-1.37, 3.59) | 0.381   | 2.41 (0.00, 4.81)       | 0.050   |
| M3    | 2.04 (0.34, 3.75)                                                                                   | 0.019   | 1.95 (-0.24, 4.14) | 0.081   | 1.05 (-1.43, 3.54) | 0.406   | 2.35 (-0.05, 4.76)      | 0.055   |
| M4    | 1.94 (0.22, 3.65)                                                                                   | 0.027   | 1.82 (-0.39, 4.03) | 0.107   | 0.86 (-1.66, 3.38) | 0.502   | 2.08 (-0.37, 4.52)      | 0.096   |
| M5    | 1.97 (0.25, 3.68)                                                                                   | 0.024   | 1.98 (-0.22, 4.18) | 0.078   | 1.05 (-1.45, 3.55) | 0.411   | 2.14 (-0.29, 4.57)      | 0.084   |
| M6    | 2.03 (0.32, 3.75)                                                                                   | 0.020   | 2.03 (-0.18, 4.23) | 0.072   | 1.07 (-1.45, 3.59) | 0.404   | 2.17 (-0.27, 4.61)      | 0.081   |
| M7    | 1.98 (0.25, 3.72)                                                                                   | 0.025   | 1.68 (-0.55, 3.91) | 0.141   | 1.08 (-1.45, 3.60) | 0.403   | 2.41 (-0.02, 4.85)      | 0.052   |
| M8    | 2.20 (0.46, 3.94)                                                                                   | 0.013   | 1.85 (-0.40, 4.10) | 0.106   | 1.08 (-1.47, 3.62) | 0.407   | 1.85 (-0.62, 4.32)      | 0.143   |
| M9    | 1.98 (0.27, 3.69)                                                                                   | 0.023   | 1.86 (-0.34, 4.06) | 0.098   | 0.93 (-1.57, 3.44) | 0.464   | 2.08 (-0.35, 4.51)      | 0.094   |
| M10   | 2.00 (0.28, 3.72)                                                                                   | 0.022   | 1.89 (-0.32, 4.09) | 0.094   | 0.82 (-1.69, 3.33) | 0.520   | 2.06 (-0.37, 4.50)      | 0.097   |
| M11   | 2.10 (0.38, 3.83)                                                                                   | 0.017   | 2.04 (-0.18, 4.26) | 0.072   | 1.29 (-1.25, 3.82) | 0.320   | 2.25 (-0.21, 4.72)      | 0.073   |
| M12   | 2.05 (0.31, 3.78)                                                                                   | 0.021   | 1.97 (-0.27, 4.20) | 0.085   | 1.50 (-1.06, 4.05) | 0.250   | 2.26 (-0.22, 4.74)      | 0.074   |
| M13   | 1.99 (0.25, 3.72)                                                                                   | 0.025   | 1.79 (-0.44, 4.03) | 0.116   | 1.50 (-1.05, 4.06) | 0.248   | 2.01 (-0.47, 4.48)      | 0.112   |
| M14   | 1.95 (0.23, 3.66)                                                                                   | 0.026   | 1.98 (-0.23, 4.19) | 0.080   | 1.38 (-1.13, 3.90) | 0.282   | 2.23 (-0.22, 4.68)      | 0.075   |
| M15   | 2.09 (0.38, 3.79)                                                                                   | 0.016   | 1.98 (-0.21, 4.17) | 0.076   | 1.17 (-1.31, 3.65) | 0.355   | 2.37 (-0.04, 4.77)      | 0.054   |
| M16   | 2.12 (0.42, 3.83)                                                                                   | 0.014   | 2.62 (0.41, 4.82)  | 0.020   | 0.82 (-1.67, 3.31) | 0.519   | 3.27 (0.85, 5.70)       | 0.008   |
| M17   | 1.77 (0.08, 3.46)                                                                                   | 0.040   | 1.67 (-0.51, 3.84) | 0.133   | 0.98 (-1.49, 3.45) | 0.438   | 2.12 (-0.30, 4.53)      | 0.085   |
| M18   | 2.06 (0.36, 3.76)                                                                                   | 0.018   | 1.96 (-0.23, 4.15) | 0.079   | 1.13 (-1.36, 3.61) | 0.374   | 2.47 (0.07, 4.86)       | 0.044   |

<sup>a</sup> A higher value in the test indicates better working memory; <sup>b</sup> a higher value in the test indicates greater inattentiveness. M0: Linear mixed models for the unadjusted change (i.e. adjusted for age, corresponding noise indicator  $\times$  age, with child and school as nested random effects). M1 (Main adjustment set without TRAPs): M0 further adjusted for age, sex, maternal education, socio-economical vulnerability index at home. M2 (Main model): M1 further adjusted for outdoor or indoor traffic-related air pollution (TRAPs) at school, respectively, for models with the corresponding outdoor or indoor noise indicators. M3 to M17 correspond to M2 further adjusted for: M3: type of school, M4: Paternal education, M5: Foreign origin, M6: Marital status, M7: Overweight, M8: Computer games in the weekend, M9: Siblings, M10: Adoption, M11: Smoking during pregnancy, M12: Preterm birth, M13: Birth weight, M14: Breastfeeding, M15: Socio-economical vulnerability index at school, M16: School education quality, M17: Behavioural problems, M18: Paired school by design as nested random effect.
