# Supplementary material for: Exposure to road traffic noise and cognitive development in schoolchildren in Barcelona, Spain: A population-based cohort study
Source: PubMed Central journal article supplement (PMC9162347; doi:10.1371/journal.pmed.1004001), 2022-06-02
Supplement: pmed.1004001.s007.pdf [file pmed.1004001.s007.pdf]

**S6 Table. Unadjusted and additionally adjusted models for the association between school exposure to noise intermittency ratio (IR, per 10% change) and 12-month change of working memory, complex working memory and inattentiveness (n = 2680 children, 9984 repeats).**

| Working memory (2-back number stimuli (detectability: d')) <sup>a</sup> |                    |         |                      |         |                      |         |
|-------------------------------------------------------------------------|--------------------|---------|----------------------|---------|----------------------|---------|
| Model                                                                   | IR, street         |         | IR, playground       |         | IR, indoor           |         |
|                                                                         | $\beta$ (95%CI)    | p-value | $\beta$ (95%CI)      | p-value | $\beta$ (95%CI)      | p-value |
| M0                                                                      | 0.73 (-1.32, 2.78) | 0.486   | -2.29 (-5.22, 0.64)  | 0.126   | -2.19 (-4.65, 0.27)  | 0.080   |
| M1                                                                      | 0.63 (-1.38, 2.63) | 0.540   | -2.56 (-5.43, 0.30)  | 0.079   | -2.24 (-4.64, 0.16)  | 0.068   |
| M2                                                                      | 0.71 (-1.29, 2.71) | 0.486   | -2.59 (-5.45, 0.27)  | 0.075   | -2.27 (-4.67, 0.13)  | 0.063   |
| M3                                                                      | 0.71 (-1.29, 2.71) | 0.488   | -2.59 (-5.44, 0.27)  | 0.076   | -2.26 (-4.66, 0.14)  | 0.065   |
| M4                                                                      | 0.84 (-1.17, 2.86) | 0.411   | -2.57 (-5.48, 0.35)  | 0.084   | -2.19 (-4.64, 0.27)  | 0.081   |
| M5                                                                      | 0.61 (-1.40, 2.61) | 0.554   | -2.42 (-5.31, 0.47)  | 0.100   | -2.10 (-4.53, 0.34)  | 0.092   |
| M6                                                                      | 0.89 (-1.13, 2.91) | 0.388   | -2.56 (-5.47, 0.35)  | 0.085   | -2.17 (-4.62, 0.28)  | 0.083   |
| M7                                                                      | 0.53 (-1.51, 2.57) | 0.610   | -3.34 (-6.23, -0.44) | 0.024   | -2.62 (-5.06, -0.19) | 0.035   |
| M8                                                                      | 0.79 (-1.24, 2.83) | 0.445   | -2.64 (-5.61, 0.34)  | 0.082   | -2.22 (-4.70, 0.27)  | 0.080   |
| M9                                                                      | 0.66 (-1.35, 2.66) | 0.521   | -2.44 (-5.33, 0.46)  | 0.099   | -2.24 (-4.67, 0.20)  | 0.072   |
| M10                                                                     | 0.76 (-1.25, 2.77) | 0.459   | -2.38 (-5.28, 0.52)  | 0.108   | -2.13 (-4.57, 0.31)  | 0.087   |
| M11                                                                     | 1.04 (-0.99, 3.08) | 0.316   | -2.26 (-5.20, 0.67)  | 0.130   | -2.16 (-4.62, 0.31)  | 0.086   |
| M12                                                                     | 0.45 (-1.59, 2.49) | 0.667   | -2.77 (-5.70, 0.16)  | 0.064   | -2.47 (-4.94, 0.00)  | 0.050   |
| M13                                                                     | 0.54 (-1.50, 2.58) | 0.604   | -2.60 (-5.53, 0.34)  | 0.083   | -2.46 (-4.93, 0.01)  | 0.051   |
| M14                                                                     | 0.69 (-1.33, 2.70) | 0.504   | -2.48 (-5.37, 0.42)  | 0.094   | -2.44 (-4.87, 0.00)  | 0.050   |
| M15                                                                     | 0.77 (-1.23, 2.76) | 0.452   | -2.67 (-5.52, 0.18)  | 0.066   | -2.29 (-4.69, 0.10)  | 0.060   |
| M16                                                                     | 0.77 (-1.23, 2.78) | 0.450   | -2.45 (-5.33, 0.43)  | 0.095   | -2.22 (-4.72, 0.28)  | 0.081   |
| M17                                                                     | 0.68 (-1.30, 2.66) | 0.499   | -2.39 (-5.25, 0.46)  | 0.101   | -1.69 (-4.10, 0.72)  | 0.170   |
| M18                                                                     | 0.71 (-1.29, 2.71) | 0.486   | -2.59 (-5.45, 0.27)  | 0.075   | -2.27 (-4.67, 0.13)  | 0.063   |

**S6 Table (Continued).**

| <b>Complex working memory (3-back number stimuli (detectability:d'))<sup>a</sup></b> |                     |         |                      |         |                      |         |
|--------------------------------------------------------------------------------------|---------------------|---------|----------------------|---------|----------------------|---------|
| Model                                                                                | IR, street          |         | IR, playground       |         | IR, indoor           |         |
|                                                                                      | $\beta$ (95%CI)     | p-value | $\beta$ (95%CI)      | p-value | $\beta$ (95%CI)      | p-value |
| M0                                                                                   | -0.63 (-2.25, 0.99) | 0.446   | -3.34 (-5.66, -1.02) | 0.005   | -2.76 (-4.70, -0.82) | 0.005   |
| M1                                                                                   | -0.67 (-2.26, 0.93) | 0.412   | -3.42 (-5.71, -1.13) | 0.003   | -2.76 (-4.66, -0.85) | 0.005   |
| M2                                                                                   | -0.66 (-2.25, 0.94) | 0.419   | -3.42 (-5.71, -1.13) | 0.003   | -2.76 (-4.66, -0.85) | 0.005   |
| M3                                                                                   | -0.66 (-2.25, 0.94) | 0.418   | -3.42 (-5.70, -1.13) | 0.003   | -2.74 (-4.64, -0.83) | 0.005   |
| M4                                                                                   | -0.67 (-2.28, 0.94) | 0.413   | -3.31 (-5.64, -0.98) | 0.005   | -2.54 (-4.49, -0.59) | 0.011   |
| M5                                                                                   | -0.57 (-2.17, 1.03) | 0.485   | -3.07 (-5.38, -0.75) | 0.009   | -2.44 (-4.37, -0.50) | 0.014   |
| M6                                                                                   | -0.80 (-2.42, 0.81) | 0.329   | -3.26 (-5.59, -0.94) | 0.006   | -2.57 (-4.52, -0.62) | 0.010   |
| M7                                                                                   | -0.68 (-2.31, 0.96) | 0.417   | -3.78 (-6.11, -1.45) | 0.001   | -3.06 (-5.00, -1.11) | 0.002   |
| M8                                                                                   | -0.59 (-2.22, 1.04) | 0.476   | -3.47 (-5.85, -1.08) | 0.004   | -2.74 (-4.72, -0.76) | 0.007   |
| M9                                                                                   | -0.75 (-2.35, 0.85) | 0.357   | -3.13 (-5.44, -0.81) | 0.008   | -2.56 (-4.49, -0.63) | 0.009   |
| M10                                                                                  | -0.68 (-2.28, 0.92) | 0.405   | -2.97 (-5.29, -0.64) | 0.012   | -2.43 (-4.37, -0.50) | 0.014   |
| M11                                                                                  | -0.43 (-2.05, 1.20) | 0.607   | -3.07 (-5.43, -0.72) | 0.010   | -2.56 (-4.52, -0.59) | 0.011   |
| M12                                                                                  | -0.70 (-2.32, 0.93) | 0.400   | -3.22 (-5.57, -0.88) | 0.007   | -2.68 (-4.64, -0.72) | 0.007   |
| M13                                                                                  | -0.66 (-2.29, 0.97) | 0.428   | -3.16 (-5.51, -0.81) | 0.008   | -2.52 (-4.49, -0.56) | 0.012   |
| M14                                                                                  | -0.67 (-2.27, 0.93) | 0.414   | -3.02 (-5.34, -0.69) | 0.011   | -2.77 (-4.70, -0.83) | 0.005   |
| M15                                                                                  | -0.57 (-2.17, 1.02) | 0.480   | -3.47 (-5.75, -1.19) | 0.003   | -2.76 (-4.66, -0.86) | 0.004   |
| M16                                                                                  | -0.57 (-2.17, 1.03) | 0.485   | -3.32 (-5.62, -1.02) | 0.005   | -2.76 (-4.75, -0.78) | 0.006   |
| M17                                                                                  | -0.76 (-2.35, 0.82) | 0.345   | -3.12 (-5.42, -0.82) | 0.008   | -2.31 (-4.24, -0.39) | 0.019   |
| M18                                                                                  | -0.66 (-2.25, 0.94) | 0.419   | -3.42 (-5.71, -1.13) | 0.003   | -2.76 (-4.66, -0.85) | 0.005   |

**S6 Table (Continued).**

| Model | IR, street         |         | IR, playground    |         | IR, indoor        |         |
|-------|--------------------|---------|-------------------|---------|-------------------|---------|
|       | $\beta$ (95%CI)    | p-value | $\beta$ (95%CI)   | p-value | $\beta$ (95%CI)   | p-value |
| M0    | 0.28 (-1.18, 1.74) | 0.704   | 3.76 (1.67, 5.84) | <0.001  | 3.09 (1.35, 4.83) | <0.001  |
| M1    | 0.44 (-0.99, 1.88) | 0.544   | 3.77 (1.72, 5.82) | <0.001  | 3.05 (1.34, 4.76) | <0.001  |
| M2    | 0.43 (-1.00, 1.87) | 0.554   | 3.76 (1.71, 5.81) | <0.001  | 3.05 (1.34, 4.76) | <0.001  |
| M3    | 0.44 (-1.00, 1.87) | 0.551   | 3.76 (1.71, 5.81) | <0.001  | 3.03 (1.32, 4.74) | <0.001  |
| M4    | 0.48 (-0.96, 1.92) | 0.517   | 3.54 (1.46, 5.63) | <0.001  | 2.91 (1.16, 4.65) | 0.001   |
| M5    | 0.50 (-0.94, 1.94) | 0.498   | 3.41 (1.33, 5.48) | 0.001   | 2.87 (1.13, 4.60) | 0.001   |
| M6    | 0.47 (-0.97, 1.92) | 0.522   | 3.63 (1.56, 5.71) | <0.001  | 3.02 (1.28, 4.76) | <0.001  |
| M7    | 0.61 (-0.86, 2.07) | 0.417   | 3.93 (1.84, 6.02) | <0.001  | 3.15 (1.41, 4.88) | <0.001  |
| M8    | 0.35 (-1.12, 1.81) | 0.643   | 3.44 (1.31, 5.57) | 0.002   | 2.72 (0.95, 4.48) | 0.003   |
| M9    | 0.50 (-0.94, 1.94) | 0.497   | 3.53 (1.46, 5.61) | <0.001  | 2.88 (1.15, 4.62) | 0.001   |
| M10   | 0.53 (-0.92, 1.97) | 0.475   | 3.65 (1.57, 5.74) | <0.001  | 2.86 (1.12, 4.60) | 0.001   |
| M11   | 0.26 (-1.20, 1.72) | 0.729   | 3.62 (1.52, 5.72) | <0.001  | 2.83 (1.07, 4.58) | 0.002   |
| M12   | 0.25 (-1.21, 1.71) | 0.735   | 3.63 (1.52, 5.73) | <0.001  | 2.91 (1.15, 4.67) | 0.001   |
| M13   | 0.35 (-1.11, 1.81) | 0.635   | 3.57 (1.47, 5.67) | <0.001  | 2.89 (1.14, 4.65) | 0.001   |
| M14   | 0.30 (-1.15, 1.74) | 0.685   | 3.53 (1.44, 5.61) | <0.001  | 2.98 (1.24, 4.71) | <0.001  |
| M15   | 0.42 (-1.01, 1.85) | 0.565   | 3.78 (1.73, 5.82) | <0.001  | 3.05 (1.34, 4.76) | <0.001  |
| M16   | 0.20 (-1.24, 1.63) | 0.789   | 3.37 (1.31, 5.43) | 0.001   | 2.38 (0.60, 4.16) | 0.009   |
| M17   | 0.55 (-0.86, 1.97) | 0.444   | 3.40 (1.35, 5.46) | 0.001   | 2.55 (0.83, 4.26) | 0.004   |
| M18   | 0.43 (-1.00, 1.86) | 0.557   | 3.75 (1.70, 5.80) | <0.001  | 3.00 (1.30, 4.71) | <0.001  |

<sup>a</sup> A higher value in the test indicates better working memory; <sup>b</sup> a higher value in the test indicates greater inattentiveness. M0: Linear mixed models for the unadjusted change (i.e. adjusted for age, corresponding noise indicator  $\times$  age, with child and school as nested random effects). M1 (Main adjustment set without TRAPs): M0 further adjusted for age, sex, maternal education, socio-economical vulnerability index at home. M2 (Main model): M1 further adjusted for outdoor or indoor traffic-related air pollution (TRAPs) at school, respectively, for models with the corresponding outdoor or indoor noise indicators. M3 to M17 correspond to M2 further adjusted for: M3: type of school, M4: Paternal education, M5: Foreign origin, M6: Marital status, M7: Overweight, M8: Computer games in the weekend, M9: Siblings, M10: Adoption, M11: Smoking during pregnancy, M12: Preterm birth, M13: Birth weight, M14: Breastfeeding, M15: Socio-economical vulnerability index at school, M16: School education quality, M17: Behavioural problems, M18: Paired school by design as nested random effect.
