# Supplementary material for: Exposure to road traffic noise and cognitive development in schoolchildren in Barcelona, Spain: A population-based cohort study
Source: PubMed Central journal article supplement (PMC9162347; doi:10.1371/journal.pmed.1004001), 2022-06-02
Supplement: pmed.1004001.s008.pdf [file pmed.1004001.s008.pdf]

**S7 Table. Unadjusted and additionally adjusted models for the association between school exposure to number of noise events (NE, per 50 events) and 12-month change of working memory, complex working memory and inattentiveness (n = 2680 children, 9984 repeats).**

| Working memory (2-back number stimuli (detectability: d')) <sup>a</sup> |                      |         |                     |         |                      |         |
|-------------------------------------------------------------------------|----------------------|---------|---------------------|---------|----------------------|---------|
| Model                                                                   | NE, street           |         | NE, playground      |         | NE, indoor           |         |
|                                                                         | $\beta$ (95%CI)      | p-value | $\beta$ (95%CI)     | p-value | $\beta$ (95%CI)      | p-value |
| M0                                                                      | -4.27 (-7.06, -1.49) | 0.003   | -2.28 (-5.37, 0.81) | 0.147   | -2.67 (-5.48, 0.14)  | 0.062   |
| M1                                                                      | -4.46 (-7.17, -1.74) | 0.001   | -2.53 (-5.56, 0.51) | 0.103   | -2.71 (-5.45, 0.03)  | 0.052   |
| M2                                                                      | -4.38 (-7.08, -1.67) | 0.002   | -2.68 (-5.71, 0.35) | 0.082   | -2.72 (-5.45, 0.01)  | 0.051   |
| M3                                                                      | -4.37 (-7.07, -1.66) | 0.002   | -2.68 (-5.71, 0.35) | 0.083   | -2.72 (-5.46, 0.02)  | 0.051   |
| M4                                                                      | -4.51 (-7.26, -1.75) | 0.001   | -2.66 (-5.72, 0.41) | 0.089   | -2.86 (-5.64, -0.08) | 0.044   |
| M5                                                                      | -4.83 (-7.56, -2.09) | <0.001  | -2.73 (-5.77, 0.31) | 0.079   | -2.62 (-5.37, 0.13)  | 0.062   |
| M6                                                                      | -4.54 (-7.29, -1.78) | 0.001   | -2.65 (-5.71, 0.41) | 0.089   | -2.72 (-5.49, 0.04)  | 0.054   |
| M7                                                                      | -4.33 (-7.10, -1.56) | 0.002   | -2.98 (-6.05, 0.09) | 0.057   | -3.07 (-5.85, -0.30) | 0.030   |
| M8                                                                      | -4.59 (-7.41, -1.77) | 0.001   | -2.98 (-6.12, 0.15) | 0.062   | -2.88 (-5.68, -0.07) | 0.044   |
| M9                                                                      | -4.58 (-7.31, -1.84) | 0.001   | -2.57 (-5.61, 0.48) | 0.099   | -2.66 (-5.41, 0.09)  | 0.058   |
| M10                                                                     | -4.80 (-7.54, -2.06) | <0.001  | -2.56 (-5.61, 0.50) | 0.101   | -2.61 (-5.37, 0.14)  | 0.063   |
| M11                                                                     | -4.60 (-7.36, -1.84) | 0.001   | -2.52 (-5.60, 0.56) | 0.108   | -2.47 (-5.26, 0.31)  | 0.082   |
| M12                                                                     | -5.27 (-8.04, -2.49) | <0.001  | -2.90 (-5.98, 0.19) | 0.066   | -2.84 (-5.63, -0.05) | 0.046   |
| M13                                                                     | -4.83 (-7.60, -2.06) | <0.001  | -2.42 (-5.51, 0.67) | 0.125   | -2.88 (-5.67, -0.10) | 0.042   |
| M14                                                                     | -4.75 (-7.48, -2.01) | <0.001  | -2.57 (-5.62, 0.49) | 0.099   | -2.86 (-5.61, -0.11) | 0.042   |
| M15                                                                     | -4.41 (-7.11, -1.72) | 0.001   | -2.75 (-5.78, 0.28) | 0.075   | -2.77 (-5.49, -0.05) | 0.046   |
| M16                                                                     | -4.52 (-7.24, -1.79) | 0.001   | -2.63 (-5.70, 0.45) | 0.094   | -2.72 (-5.61, 0.18)  | 0.066   |
| M17                                                                     | -4.55 (-7.26, -1.84) | <0.001  | -2.73 (-5.74, 0.28) | 0.075   | -2.17 (-4.89, 0.55)  | 0.118   |
| M18                                                                     | -4.38 (-7.08, -1.67) | 0.002   | -2.68 (-5.71, 0.35) | 0.082   | -2.72 (-5.45, 0.01)  | 0.051   |

S7 Table (Continued).

| Complex working memory (3-back number stimuli (detectability: $d'$ )) <sup>a</sup> |                      |         |                      |         |                      |         |
|------------------------------------------------------------------------------------|----------------------|---------|----------------------|---------|----------------------|---------|
| Model                                                                              | NE, street           |         | NE, playground       |         | NE, indoor           |         |
|                                                                                    | $\beta$ (95%CI)      | p-value | $\beta$ (95%CI)      | p-value | $\beta$ (95%CI)      | p-value |
| M0                                                                                 | -3.93 (-6.14, -1.73) | <0.001  | -2.91 (-5.36, -0.46) | 0.020   | -3.21 (-5.43, -1.00) | 0.005   |
| M1                                                                                 | -4.00 (-6.16, -1.83) | <0.001  | -3.03 (-5.46, -0.61) | 0.014   | -3.22 (-5.39, -1.04) | 0.004   |
| M2                                                                                 | -3.99 (-6.16, -1.82) | <0.001  | -3.03 (-5.46, -0.61) | 0.014   | -3.22 (-5.39, -1.04) | 0.004   |
| M3                                                                                 | -3.96 (-6.13, -1.79) | <0.001  | -3.03 (-5.45, -0.61) | 0.014   | -3.18 (-5.36, -1.00) | 0.004   |
| M4                                                                                 | -4.33 (-6.53, -2.13) | <0.001  | -2.99 (-5.44, -0.53) | 0.017   | -3.01 (-5.22, -0.79) | 0.008   |
| M5                                                                                 | -4.34 (-6.53, -2.15) | <0.001  | -2.81 (-5.24, -0.38) | 0.024   | -2.94 (-5.14, -0.75) | 0.009   |
| M6                                                                                 | -4.43 (-6.63, -2.23) | <0.001  | -2.90 (-5.34, -0.45) | 0.020   | -3.04 (-5.24, -0.84) | 0.007   |
| M7                                                                                 | -4.10 (-6.33, -1.88) | <0.001  | -3.18 (-5.65, -0.72) | 0.011   | -3.56 (-5.78, -1.34) | 0.002   |
| M8                                                                                 | -4.72 (-6.98, -2.47) | <0.001  | -3.18 (-5.69, -0.67) | 0.013   | -3.39 (-5.63, -1.14) | 0.003   |
| M9                                                                                 | -4.32 (-6.50, -2.13) | <0.001  | -2.82 (-5.25, -0.39) | 0.023   | -3.02 (-5.21, -0.83) | 0.007   |
| M10                                                                                | -4.38 (-6.57, -2.19) | <0.001  | -2.77 (-5.21, -0.33) | 0.026   | -2.91 (-5.11, -0.72) | 0.009   |
| M11                                                                                | -4.37 (-6.58, -2.16) | <0.001  | -2.83 (-5.29, -0.36) | 0.025   | -2.99 (-5.21, -0.76) | 0.009   |
| M12                                                                                | -4.54 (-6.75, -2.32) | <0.001  | -2.77 (-5.23, -0.31) | 0.027   | -3.03 (-5.25, -0.81) | 0.007   |
| M13                                                                                | -4.23 (-6.45, -2.01) | <0.001  | -2.82 (-5.29, -0.35) | 0.026   | -2.99 (-5.22, -0.77) | 0.008   |
| M14                                                                                | -4.33 (-6.52, -2.15) | <0.001  | -2.61 (-5.05, -0.17) | 0.036   | -3.22 (-5.41, -1.03) | 0.004   |
| M15                                                                                | -3.97 (-6.13, -1.81) | <0.001  | -3.08 (-5.50, -0.66) | 0.013   | -3.26 (-5.43, -1.09) | 0.003   |
| M16                                                                                | -4.12 (-6.29, -1.95) | <0.001  | -3.07 (-5.53, -0.61) | 0.014   | -3.34 (-5.65, -1.03) | 0.005   |
| M17                                                                                | -4.28 (-6.46, -2.10) | <0.001  | -2.87 (-5.29, -0.45) | 0.020   | -2.80 (-4.98, -0.62) | 0.012   |
| M18                                                                                | -3.99 (-6.16, -1.82) | <0.001  | -3.03 (-5.46, -0.61) | 0.014   | -3.22 (-5.39, -1.04) | 0.004   |

**S7 Table (Continued).**

| <b>Inattentiveness (Attention Network Test, Hit reaction time standard error, HRT-SE, ms)<sup>b</sup></b> |                    |         |                    |         |                   |         |
|-----------------------------------------------------------------------------------------------------------|--------------------|---------|--------------------|---------|-------------------|---------|
| Model                                                                                                     | NE, street         |         | NE, playground     |         | NE, indoor        |         |
|                                                                                                           | $\beta$ (95%CI)    | p-value | $\beta$ (95%CI)    | p-value | $\beta$ (95%CI)   | p-value |
| M0                                                                                                        | 2.24 (0.25, 4.23)  | 0.027   | 2.31 (0.12, 4.49)  | 0.038   | 3.32 (1.32, 5.31) | 0.001   |
| M1                                                                                                        | 2.15 (0.20, 4.10)  | 0.031   | 2.21 (0.06, 4.36)  | 0.044   | 3.17 (1.21, 5.12) | 0.002   |
| M2                                                                                                        | 2.13 (0.18, 4.08)  | 0.032   | 2.22 (0.07, 4.37)  | 0.043   | 3.15 (1.20, 5.11) | 0.002   |
| M3                                                                                                        | 2.10 (0.14, 4.05)  | 0.035   | 2.21 (0.06, 4.36)  | 0.044   | 3.13 (1.17, 5.08) | 0.002   |
| M4                                                                                                        | 2.33 (0.35, 4.31)  | 0.021   | 2.10 (-0.07, 4.27) | 0.058   | 3.05 (1.06, 5.03) | 0.003   |
| M5                                                                                                        | 2.43 (0.45, 4.41)  | 0.016   | 1.97 (-0.20, 4.13) | 0.075   | 3.01 (1.03, 4.98) | 0.003   |
| M6                                                                                                        | 2.43 (0.45, 4.41)  | 0.016   | 2.13 (-0.04, 4.30) | 0.054   | 3.11 (1.14, 5.09) | 0.002   |
| M7                                                                                                        | 2.41 (0.41, 4.41)  | 0.018   | 2.35 (0.15, 4.54)  | 0.036   | 3.31 (1.32, 5.30) | 0.001   |
| M8                                                                                                        | 2.42 (0.39, 4.45)  | 0.020   | 1.88 (-0.34, 4.11) | 0.097   | 2.89 (0.88, 4.90) | 0.005   |
| M9                                                                                                        | 2.38 (0.41, 4.35)  | 0.018   | 2.04 (-0.13, 4.20) | 0.065   | 2.99 (1.01, 4.96) | 0.003   |
| M10                                                                                                       | 2.54 (0.56, 4.52)  | 0.012   | 2.09 (-0.08, 4.26) | 0.059   | 2.97 (0.99, 4.95) | 0.003   |
| M11                                                                                                       | 2.58 (0.59, 4.58)  | 0.011   | 2.25 (0.07, 4.43)  | 0.043   | 3.06 (1.07, 5.06) | 0.003   |
| M12                                                                                                       | 2.52 (0.52, 4.52)  | 0.013   | 2.22 (0.03, 4.41)  | 0.047   | 3.22 (1.22, 5.22) | 0.002   |
| M13                                                                                                       | 2.39 (0.39, 4.39)  | 0.019   | 2.12 (-0.07, 4.31) | 0.058   | 3.24 (1.25, 5.24) | 0.001   |
| M14                                                                                                       | 2.33 (0.35, 4.31)  | 0.021   | 2.13 (-0.04, 4.31) | 0.054   | 3.14 (1.16, 5.11) | 0.002   |
| M15                                                                                                       | 2.12 (0.17, 4.07)  | 0.033   | 2.22 (0.07, 4.37)  | 0.043   | 3.15 (1.20, 5.11) | 0.002   |
| M16                                                                                                       | 1.89 (-0.07, 3.85) | 0.058   | 1.71 (-0.47, 3.89) | 0.125   | 2.24 (0.16, 4.31) | 0.035   |
| M17                                                                                                       | 2.17 (0.22, 4.13)  | 0.029   | 1.90 (-0.24, 4.04) | 0.082   | 2.64 (0.69, 4.59) | 0.008   |
| M18                                                                                                       | 2.12 (0.17, 4.07)  | 0.034   | 2.21 (0.06, 4.36)  | 0.044   | 3.14 (1.18, 5.09) | 0.002   |

<sup>a</sup> A higher value in the test indicates better working memory; <sup>b</sup> a higher value in the test indicates greater inattentiveness. M0: Linear mixed models for the unadjusted change (i.e. adjusted for age, corresponding noise indicator  $\times$  age, with child and school as nested random effects). M1 (Main adjustment set without TRAPs): M0 further adjusted for age, sex, maternal education, socio-economical vulnerability index at home. M2 (Main model): M1 further adjusted for outdoor or indoor traffic-related air pollution (TRAPs) at school, respectively, for models with the corresponding outdoor or indoor noise indicators. M3 to M17 correspond to M2 further adjusted for: M3: type of school, M4: Paternal education, M5: Foreign origin, M6: Marital status, M7: Overweight, M8: Computer games in the weekend, M9: Siblings, M10: Adoption, M11: Smoking during pregnancy, M12: Preterm birth, M13: Birth weight, M14: Breastfeeding, M15: Socio-economical vulnerability index at school, M16: School education quality, M17: Behavioural problems, M18: Paired school by design as nested random effect.
